# Supplementary material
Source: PubMed Central journal article supplement (PMC8091018)
Supplement: AEM.02584-20-s0001.pdf [file AEM.02584-20-s0001.pdf]

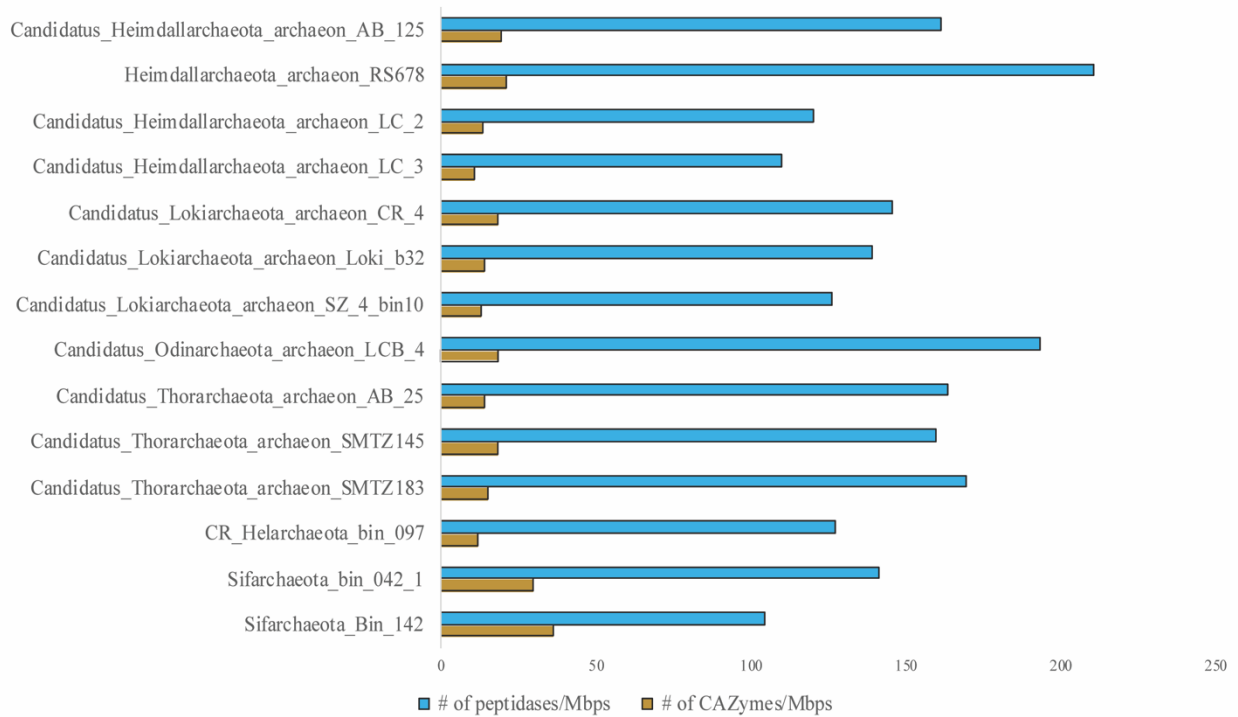

Supplemental Figure 1: Relative densities (numbers per 1 Mb) of peptidases and CAZymes encoded by the different Asgard MAGs.

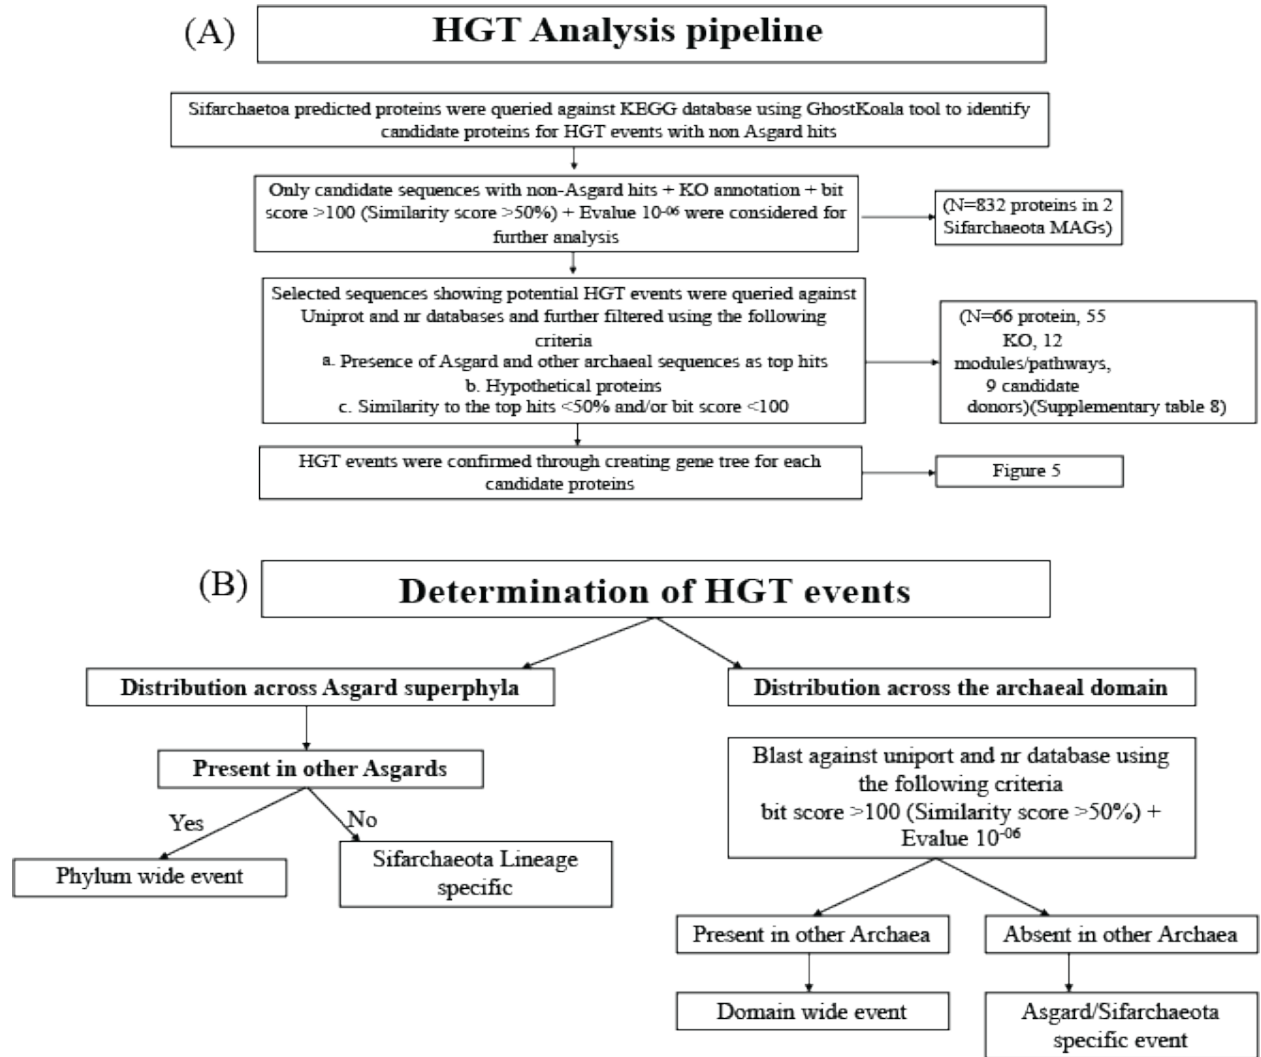

Supplementary Figure 2. Workflow diagram describes the steps followed to identify HGT events in Sifarchaeota MAGs.

The following trees are visualized in Figure 5 of the main manuscript. We provide these files for others to evaluate the data on their own. Due to supplemental file type requirements, these data are not provided in a standard format.

>Supplementary tree 1\_ARSC\_HGT

(KPK62542\_1\_hypothetical\_protein\_AMJ83\_10530\_candidate\_division\_WOR\_3\_bacterium\_SM23\_42:0.6883476032,((((((((((((((HMM73760\_1\_arsenate\_reductase\_ArsC\_Armatimonadetes\_bacterium:0.5215106116,(VVB90874\_1\_Protein\_ArsC\_uncultured\_archaeon:0.0686560991,(WP\_097300620\_1\_arsenate\_reductase\_ArsC\_Candidatus\_Methanoperedens\_sp\_\_BL22:0.0467632148,VVB52417\_1\_Protein\_ArsC\_uncultured\_archaeon:0.0619802600)/0.978/93:0.0632425790)/1/100:0.3795295636)/1/85:0.1744631174,(GBD39594\_1\_Glutaredoxin\_arsenate\_reductase\_bacterium\_HR37:0.0371756289,HEE45704\_1\_arsenate\_reductase\_ArsC\_Candidatus\_Dadabacter

ia\_bacterium:0.0741878474)/1/100:0.5687504062)/0.619/15:0.0655277365,(((AGK61940\_1\_protein\_tyrosine\_phosphatase\_Archaeoglobus\_sulfaticallidus\_PM70-1:0.0000023071,WP\_144060627\_1\_arsenate\_reductase\_ArsC\_Archaeoglobus\_sulfaticallidus:0.0000026090)/1/100:0.3438770824,WP\_089322863\_1\_arsenate\_reductase\_ArsC\_Desulfurobacterium\_atlanticum:0.3277786338)/0.841/49:0.1439624035,(HEK12798\_1\_arsenate\_reductase\_ArsC\_Firmicutes\_bacterium:0.0918459695,HHV81168\_1\_arsenate\_reductase\_ArsC\_bacterium:0.4097082984)/1/98:0.1958182604)/0.955/46:0.0840257954)/0.877/18:0.0571058582,((((NC027882\_1\_arsenate\_reductase\_ArsC\_Caldiserica\_bacterium:0.3227862770,WP\_014453204\_1\_arsenate\_reductase\_ArsC\_Caldisericum\_exile:0.2846033994)/1/97:0.2248958087,(HGB36497\_1\_arsenate\_reductase\_ArsC\_candidate\_division\_WOR-3\_bacterium:0.1506166647,(HGL17194\_1\_arsenate\_reductase\_ArsC\_candidate\_division\_WOR-3\_bacterium:0.0043361890,HEN27581\_1\_arsenate\_reductase\_ArsC\_candidate\_division\_WOR-3\_bacterium:0.0155194265)/0.92/97:0.0438396188)/1/100:0.2206997977)/1/94:0.2018140403,(HHG31710\_1\_arsenate\_reductase\_ArsC\_Candidatus\_Bathyarchaeota\_archaeon:0.0775001406,HGV82126\_1\_arsenate\_reductase\_ArsC\_Candidatus\_Bathyarchaeota\_archaeon:0.0491070341)/1/100:0.3446997724)/0.949/78:0.0653305776,OHB89469\_1\_hypothetical\_protein\_A3D13\_04530\_Planctomycetes\_bacterium\_RIFCSPHIGHO2\_02\_FULL\_40\_12:0.4135381382)/0.713/46:0.0315643456,(HGE41023\_1\_arsenate\_reductase\_ArsC\_Candidatus\_Bathyarchaeota\_archaeon:0.3984790250,HID57387\_1\_arsenate\_reductase\_ArsC\_Candidatus\_Poribacteria\_bacterium:0.4602127824)/0.988/56:0.1378209077)/0.335/16:0.0033942439)/0.967/10:0.0258863606,(((EKQ53689\_1\_protein-tyrosine-phosphatase\_Methanobacterium\_sp\_\_Maddingley\_MBC34:0.2957387919,HII84670\_1\_arsenate\_reductase\_ArsC\_Methanobacterium\_subterraneum:0.2681505830)/1/100:0.3586916887,(HHD32168\_1\_arsenate\_reductase\_ArsC\_Elusimicrobia\_bacterium:0.5299854819,(WP\_051962905\_1\_arsenate\_reductase\_ArsC\_Mesoaciditoga\_lauensis:0.1969563479,WP\_170288391\_1\_arsenate\_reductase\_ArsC\_Athalassotoga\_saccharophila:0.2394146168)/1/100:0.2546071047)/0.553/72:0.0348903307)/0.385/51:0.0095034242,((((RLB23930\_1\_arsenate\_reductase\_ArsC\_Deltaproteobacteria\_bacterium:0.0000026090,RLB13927\_1\_arsenate\_reductase\_ArsC\_Deltaproteobacteria\_bacterium:0.0167828953)/1/100:0.3994751689,RLB21206\_1\_arsenate\_reductase\_ArsC\_Deltaproteobacteria\_bacterium:0.4119684034)/0.984/90:0.1102591154,KPK30277\_1\_hypothetical\_protein\_AMK69\_03890\_Nitrospira\_bacterium\_SG8\_3:0.3805210912)/0.967/76:0.1277149617,(PMQ01019\_1\_low\_molecular\_weight\_phosphatase\_family\_protein\_Dictyoglomus\_sp\_\_NZ13-RE01:0.4375822238,(WP\_148807201\_1\_arsenate\_reductase\_ArsC\_Dictyoglomus\_sp\_\_ob1-4:0.1969094564,(WP\_012582904\_1\_arsenate\_reductase\_ArsC\_Dictyoglomus\_turgidum:0.0404254731,WP\_012547737\_1\_arsenate\_reductase\_ArsC\_Dictyoglomus\_thermophilum:0.0782769039)/0.626/74:0.0268078054)/1/99:0.1598997148)/0.989/78:0.0873309551)/0.924/71:0.0837055463,(KUK27081\_1\_Arsenate\_reductase\_Acetothermia\_bacterium\_64\_32:0.2163525771,HGE04479\_1\_arsenate\_reductase\_ArsC\_Hadesarchaea\_archaeon:0.3348946858)/1/72:0.1295879165)/0.892/43:0.0331409268,(HGR05741\_1\_arsenate\_reductase\_ArsC\_Synergistetes\_bacterium:0.4063618836,KUK13738\_1\_Arsenate\_reductase\_bacterium\_42\_11:0.3368598429)/0.974/58:0.1160406325)/1/62:0.1322638821)/0.969/37:0.0362872747,HGM97662\_1\_arsenate\_reductase\_ArsC\_candidate\_division\_WOR-3\_bacterium:0.4810189623)/0.943/19:0.0221041877)/0.514/9:0.0216030184,(MQY57816\_1\_a

rsenate\_reductase\_ArsC\_bacterium:0.5897230732,(RLG01204\_1\_arsenate\_reductase\_ArsC\_Thermococci\_archaeon:0.0031489539,RLF94975\_1\_arsenate\_reductase\_ArsC\_Thermococci\_archaeon:0.0227627506)/1/100:0.4524297333)/0.384/17:0.0327495297)/0.991/36:0.0834710163,(((WP\_004078601\_1\_arsenate\_reductase\_ArsC\_Methanoplanus\_limicola:0.4206215052,((PKL63865\_1\_low\_molecular\_weight\_phosphatase\_family\_protein\_Methanomicrobiales\_archaeon\_HGW-Methanomicrobiales-3:0.1095938135,PKG32063\_1\_low\_molecular\_weight\_phosphatase\_family\_protein\_Methanoregula\_sp\_:0.0826037242)/0.993/84:0.0484603541,PKG31283\_1\_low\_molecular\_weight\_phosphatase\_family\_protein\_Methanoregula\_sp\_:0.0492198522)/1/100:0.2594843113)/1/99:0.2758770553,(((NBC15915\_1\_arsenate\_reductase\_ArsC\_Bacteroidetes\_bacterium:0.4704597334,(WP\_166973653\_1\_arsenate\_reductase\_ArsC\_Rhodothermaceae\_bacterium\_ISCAR-4553:0.2224820562,(WP\_068126181\_1\_arsenate\_reductase\_ArsC\_Rhodothermaceae\_bacterium\_RA:0.2521846691,(WP\_161540267\_1\_arsenate\_reductase\_ArsC\_Rhodothermus\_marinus:0.0238799448,GBD02057\_1\_Glutaredoxin\_arsenate\_reductase\_bacterium\_HR18:0.2020793536)/1/100:0.3065163507)/0.904/61:0.0931310884)/1/100:0.2798896205)/0.998/91:0.1501850243,(TRZ89824\_1\_arsenate\_reductase\_ArsC\_bacterium:0.5719458171,((ADI01578\_1\_Protein-tyrosine\_phosphatase\_\_low\_molecular\_weight\_Syntrophothermus\_lipocalidus\_DSM\_12680:0.0088360975,NSW83950\_1\_arsenate\_reductase\_ArsC\_Syntrophothermus\_sp\_:0.0000023633)/1/100:0.5051541221,WP\_073093409\_1\_arsenate\_reductase\_ArsC\_Thermosyntropha\_lipolytica:0.2579920493)/0.986/89:0.1144026844)/0.919/70:0.0798485605)/0.951/60:0.0792910775,((WP\_004098505\_1\_arsenate\_reductase\_ArsC\_Acetonema\_longum:0.5181729369,WP\_122629671\_1\_arsenate\_reductase\_ArsC\_Lucifera\_butyrlica:0.3515945031)/0.948/76:0.1070803892,((BB90060\_1\_arsenate-mycothiyl\_transferase\_ArsC2\_Methylomusa\_anaerophila:0.0000024542,WP\_126306508\_1\_arsenate\_reductase\_ArsC\_Methylomusa\_anaerophila:0.0000020478)/1/100:0.4073670975,((WP\_122629742\_1\_arsenate\_reductase\_ArsC\_Lucifera\_butyrlica:0.0000020470,VBB08891\_1\_low\_molecular\_weight\_phosphotyrosine\_protein\_phosphatase\_Lucifera\_butyrlica:0.0000026106)/1/100:0.1671256818,(WP\_093687171\_1\_arsenate\_reductase\_ArsC\_Sporolituus\_thermophilus:0.0756889713,WP\_122627408\_1\_arsenate\_reductase\_ArsC\_Lucifera\_butyrlica:0.1062009454)/1/96:0.0915262713)/0.999/95:0.1093094612)/0.701/62:0.0273118160)/0.722/62:0.0493253145,(WP\_084577247\_1\_arsenate\_reductase\_ArsC\_Sporomusa\_malonica:0.1869811553,(WP\_127038329\_1\_MULTISPECIES\_arsenate\_reductase\_ArsC\_unclassified\_Sporomusaceae:0.0816179470,WP\_172376138\_1\_arsenate\_reductase\_ArsC\_bacterium\_BFN5:0.1613912284)/1/100:0.3208390406)/1/84:0.1496188447)/1/95:0.1349026034)/0.511/49:0.0511760155,PKN34016\_1\_low\_molecular\_weight\_phosphatase\_family\_protein\_Deltaproteobacteria\_bacterium\_HGW-Deltaproteobacteria-19:0.8733044747)/0.366/39:0.0233058728)/0.948/82:0.1025300548,HEW92457\_1\_arsenate\_reductase\_ArsC\_Thermotogaceae\_bacterium:0.1963876741)/0.809/64:0.0505897882,(TET82196\_1\_arsenate\_reductase\_ArsC\_candidate\_division\_TA06\_bacterium:0.0000023662,TET45119\_1\_arsenate\_reductase\_ArsC\_candidate\_division\_TA06\_bacterium:0.0542714893)/1/100:0.5277630701)/0.335/28:0.0023910462)/0.999/36:0.0516207034,(((OGD29239\_1\_ArsC\_family\_transcriptional\_regulator\_Candidatus\_Aminicenantes\_bacterium\_RBG\_13\_63\_10:0.7717354515,(KRT65598\_1\_arsenate\_reductase\_\_arsenate\_reductase\_Candidatus\_Dadabacteria\_bacterium\_CSP1-

2:0.0000025359,KRT63461\_1\_arsenate\_reductase\_\_arsenate\_reductase\_Candidatus\_Dadabact  
eria\_bacterium\_CSP1-  
2:0.0071242702)/1/100:0.4056032046)/0.928/67:0.1139295420,((OPX86842\_1\_Arsenate-  
mycothiol\_transferase\_ArsC1\_Pelotomaculum\_sp\_\_PtaB\_Bin013:0.4818442188,NQT80213\_1\_  
arsenate\_reductase\_ArsC\_Candidatus\_Aminicenantes\_bacterium:0.4919825340)/0.746/75:0.1  
137281368,ODS41340\_1\_ArsC\_family\_transcriptional\_regulator\_Candidatus\_Altiarchaeales\_ar  
chaeon\_WOR\_SM1\_SCG:0.4269741565)/0.858/45:0.0832656861)/0.398/28:0.0235668740,(OP  
X18667\_1\_low\_molecular\_weight\_phosphatase\_family\_protein\_candidate\_division\_WOR-  
3\_bacterium\_4484\_100:0.7652331290,HFW75970\_1\_arsenate\_reductase\_ArsC\_Candidatus\_A  
minicenantes\_bacterium:0.2402574212)/0.997/86:0.1719835457)/0.989/56:0.0809701549,(OH  
B83191\_1\_ArsC\_family\_transcriptional\_regulator\_Planctomycetes\_bacterium\_RIFCSPHIGHO2\_  
02\_FULL\_38\_41:0.4338407919,HGD17745\_1\_arsenate\_reductase\_ArsC\_Candidatus\_Bathyarch  
aeota\_archaeon:0.4304794181)/0.858/77:0.0969827530)/0.812/38:0.0339882760)/0.333/9:0.  
0000021567,RKY77289\_1\_arsenate\_reductase\_ArsC\_candidate\_division\_KSB1\_bacterium:0.28  
09673922)/0.333/9:0.0000020209,((OGE20354\_1\_hypothetical\_protein\_A3J42\_04065\_Candid  
atus\_Dadabacteria\_bacterium\_RIFCSPHIGHO2\_12\_FULL\_53\_21:0.4775039693,(TDI91151\_1\_ar  
senate\_reductase\_ArsC\_Candidatus\_Dadabacteria\_bacterium:0.2624805772,TFG77090\_1\_arse  
nate\_reductase\_ArsC\_Thermodesulfobacterales\_bacterium:0.2344623350)/1/98:0.203217150  
9)/1/99:0.2964313116,((OGD54358\_1\_ArsC\_family\_transcriptional\_regulator\_Candidatus\_Bath  
yarchaeota\_archaeon\_RBG\_13\_38\_9:0.5020864277,NCN64584\_1\_arsenate\_reductase\_ArsC\_C  
andidatus\_Altiarchaeum\_hamiconexum:0.2584636472)/0.992/90:0.1557366652,OQX18571\_1\_  
low\_molecular\_weight\_phosphatase\_family\_protein\_Candidatus\_Altiarchaeales\_archaeon\_A3:  
0.5368600859)/0.362/30:0.0382438455)/0.965/50:0.0997288602)/0.976/33:0.0156807739,(((T  
RO46400\_1\_arsenate\_reductase\_ArsC\_Candidatus\_Bathyarchaeota\_archaeon:0.5982532582,((  
PVX24423\_1\_low\_molecular\_weight\_phosphatase\_family\_protein\_Candidatus\_Bathyarchaeot  
a\_archaeon:0.3902545844,PVX26938\_1\_low\_molecular\_weight\_phosphatase\_family\_protein\_  
Candidatus\_Bathyarchaeota\_archaeon:0.2288493661)/0.944/85:0.0905438870,HGC54911\_1\_a  
rsenate\_reductase\_ArsC\_Candidatus\_Bathyarchaeota\_archaeon:0.3122492322)/0.939/84:0.06  
97343179)/0.959/78:0.1109166717,(TET64412\_1\_arsenate\_reductase\_ArsC\_Candidatus\_Bathy  
archaeota\_archaeon:0.2646021503,(TET19166\_1\_arsenate\_reductase\_ArsC\_Candidatus\_Bathy  
archaeota\_archaeon:0.0000020216,TEU05477\_1\_arsenate\_reductase\_ArsC\_\_partial\_Candidat  
us\_Bathyarchaeota\_archaeon:0.0000026090)/1/100:0.2227823225)/0.554/51:0.0383911536)/  
0.879/52:0.0209164280,NIO37828\_1\_arsenate\_reductase\_ArsC\_Candidatus\_Bathyarchaeota\_a  
rchaeon:0.4633834665)/1/81:0.1095876300)/0.86/43:0.0404258757,(WP\_168058556\_1\_arsen  
ate\_reductase\_ArsC\_Nitrospiraceae\_bacterium\_HYJII51-Mn-bac16s-1-  
B09:0.7221338365,RKX68307\_1\_arsenate\_reductase\_ArsC\_candidate\_division\_WOR-  
3\_bacterium:0.2751315555)/0.844/30:0.0670888181)/0.337/17:0.0087585029,Bin\_142\_k127\_  
656351\_3:0.3132743814)/0.995/34:0.1075839388,(HDS46348\_1\_arsenate\_reductase\_ArsC\_M  
ethanomicrobia\_archaeon:0.4915661503,RZN42474\_1\_arsenate\_reductase\_ArsC\_Methanopha  
gales\_archaeon\_ANME-1-THS:0.4097803553)/0.474/78:0.0809977281);

Supplementary Tree 2: K0004\_HGT

(RMF93212\_1\_112-349\_2\_3-  
butanediol\_dehydrogenase\_\_Candidatus\_Schekmanbacteria\_bacterium1:0.6406786466,((Bin\_142\_k127\_1507214\_1:0.7496898746,(((NOQ42710\_1\_115-351\_alcohol\_dehydrogenase\_catalytic\_domain-containing\_protein\_\_Desulfuromusa\_sp\_1:0.4865284707,(((WP\_044823130\_1\_113-351\_2\_3-butanediol\_dehydrogenase\_\_Clostridium\_aceticum1:0.0220531258,WP\_070966338\_1\_113-351\_2\_3-butanediol\_dehydrogenase\_\_Clostridium\_formicaceticum1:0.0131208284)/1/100:0.2790612217,WP\_093795328\_1\_114-351\_2\_3-butanediol\_dehydrogenase\_\_Sporomusa\_acidovorans1:0.2587851341)/0.599/38:0.0498086717,(((WP\_014186570\_1\_114-351\_2\_3-butanediol\_dehydrogenase\_\_Desulfosporosinus\_orientis1:0.0044050066,KJS49509\_1\_114-351\_butanediol\_dehydrogenase\_\_Peptococcaceae\_bacterium\_BRH\_c231:0.0188428842)/1/97:0.0335410282,(WP\_045572949\_1\_114-351\_MULTISPECIES\_\_2\_3-butanediol\_dehydrogenase\_\_unclassified\_Desulfosporosinus1:0.0229644918,WP\_009612770\_1\_114-352\_2\_3-butanediol\_dehydrogenase\_\_Desulfosporosinus\_sp\_\_OT1:0.0205706714)/1/83:0.0183149444)/0.848/67:0.0090481005,HBP63237\_1\_114-352\_butanediol\_dehydrogenase\_\_Desulfosporosinus\_sp\_1:0.0307453420)/1/99:0.0880599195)/0.995/63:0.0805797115,(WP\_135545798\_1\_113-351\_2\_3-butanediol\_dehydrogenase\_\_Desulfosporosinus\_fructosivorans1:0.1102030191,ADJ94041\_1\_113-350\_putative\_zinc-containing\_alcohol\_dehydrogenase\_\_partial\_\_Clostridia\_bacterium\_enrichment\_culture\_clone\_BF1:0.1017518800)/1/99:0.1199981454)/0.907/64:0.0480161210)/0.884/30:0.0453247236,(((WP\_027852205\_1\_114-351\_2\_3-butanediol\_dehydrogenase\_\_Marinobacterium\_litorale1:0.0000010000,MBS97311\_1\_114-351\_butanediol\_dehydrogenase\_\_Oceanospirillaceae\_bacterium1:0.0039720288)/1/100:0.2087417423,((WP\_102840396\_1\_114-351\_2\_3-butanediol\_dehydrogenase\_\_Pseudomonas\_stutzeri1:0.0039746270,(((WP\_156244052\_1\_114-351\_alcohol\_dehydrogenase\_catalytic\_domain-containing\_protein\_\_Pseudomonas\_stutzeri1:0.0079646976,WP\_061341166\_1\_114-351\_2\_3-butanediol\_dehydrogenase\_\_Pseudomonas\_balearica1:0.0000027290)/0.994/43:0.0039612664,((WP\_174214557\_1\_120-357\_alcohol\_dehydrogenase\_catalytic\_domain-containing\_protein\_\_Pseudomonas\_sp\_\_R2A21:0.0000000000,TVT72789\_1\_114-351\_2\_3-butanediol\_dehydrogenase\_\_Pseudomonas\_sp\_1:0.0000000000):0.0000010000,AWT12626\_1\_114-351\_butanediol\_dehydrogenase\_\_Pseudomonas\_sp\_\_R2A21:0.0000010000)/0.333/79:0.0000010000)/0.333/11:0.0000023372,((((((((WP\_125868202\_1\_114-351\_2\_3-butanediol\_dehydrogenase\_\_Pseudomonas\_stutzeri1:0.0080001416,(((WP\_013983490\_1\_120-357\_2\_3-butanediol\_dehydrogenase\_\_Pseudomonas\_stutzeri1:0.0040081828,((WP\_170915828\_1\_120-357\_alcohol\_dehydrogenase\_catalytic\_domain-containing\_protein\_\_Pseudomonas\_stutzeri1:0.0000010000,OPG84966\_1\_114-351\_butanediol\_dehydrogenase\_\_Pseudomonas\_stutzeri1:0.0000010000)/0.998/93:0.0039826

633,WP\_172882550\_1\_120-357\_alcohol\_dehydrogenase\_catalytic\_domain-  
containing\_protein\_\_Pseudomonas\_stutzeri1:0.0000010000)/0.997/71:0.0039942452)/0.333/1  
1:0.0000010000,(WP\_151320629\_1\_114-351\_2\_3-  
butanediol\_dehydrogenase\_\_Pseudomonas\_stutzeri1:0.0040025865,((WP\_172974175\_1\_120-  
357\_alcohol\_dehydrogenase\_catalytic\_domain-  
containing\_protein\_\_Pseudomonas\_sp\_\_THAF7b1:0.0000010000,MAL91415\_1\_114-  
351\_butanediol\_dehydrogenase\_\_Pseudomonas\_sp\_1:0.0000010000)/1/94:0.0040086171,(W  
P\_102832641\_1\_114-351\_2\_3-  
butanediol\_dehydrogenase\_\_Pseudomonas\_kunmingensis1:0.0039922618,(WP\_108242532\_1  
\_114-351\_2\_3-  
butanediol\_dehydrogenase\_\_Pseudomonas\_stutzeri1:0.0039939008,(((WP\_172600223\_1\_119-  
356\_2\_3-  
butanediol\_dehydrogenase\_\_Pseudomonas\_stutzeri1:0.0000000000,WP\_061374365\_1\_114-  
351\_2\_3-  
butanediol\_dehydrogenase\_\_Pseudomonas\_stutzeri1:0.0000000000):0.0000000000,RCL53849  
\_1\_113-  
350\_butanediol\_dehydrogenase\_\_Pseudomonas\_sp\_1:0.0000000000):0.0000010000,WP\_1258  
86416\_1\_114-351\_2\_3-  
butanediol\_dehydrogenase\_\_Pseudomonas\_stutzeri1:0.0000010000)/0.333/32:0.0000010000)  
/0.333/7:0.0000010000)/0.333/8:0.0000010000)/0.333/21:0.0000010000)/0.997/51:0.003991  
5083)/0.333/10:0.0000010000,WP\_125853524\_1\_114-351\_2\_3-  
butanediol\_dehydrogenase\_\_Pseudomonas\_stutzeri1:0.0039952565)/0.333/4:0.0000010000)/  
0.333/13:0.0000010000,(WP\_162557888\_1\_120-  
357\_alcohol\_dehydrogenase\_catalytic\_domain-  
containing\_protein\_\_Pseudomonas\_stutzeri1:0.0000010000,AWL02330\_1\_114-  
351\_butanediol\_dehydrogenase\_\_Pseudomonas\_stutzeri1:0.0000010000)/1/94:0.0040228906  
)/0.333/7:0.0000010000,(WP\_019405926\_1\_120-  
357\_alcohol\_dehydrogenase\_catalytic\_domain-  
containing\_protein\_\_Pseudomonas\_stutzeri1:0.0000010000,OCX58080\_1\_114-  
351\_butanediol\_dehydrogenase\_\_Pseudomonas\_stutzeri1:0.0000010000)/1/95:0.0039876105  
)/0.333/3:0.0000010000,HBC24169\_1\_49-  
286\_butanediol\_dehydrogenase\_\_Pseudomonas\_sp\_1:0.0040342518)/0.333/4:0.0000010000,  
WP\_045158803\_1\_114-351\_2\_3-  
butanediol\_dehydrogenase\_\_Pseudomonas\_stutzeri1:0.0040066593)/0.333/8:0.0000010000,((  
(((AKN27976\_1\_120-357\_L-iditol\_2-  
dehydrogenase\_\_Pseudomonas\_stutzeri1:0.0000000000,WP\_170799166\_1\_120-  
357\_alcohol\_dehydrogenase\_catalytic\_domain-  
containing\_protein\_\_Pseudomonas\_stutzeri1:0.0000000000):0.0000000000,WP\_037000037\_1  
\_114-351\_2\_3-  
butanediol\_dehydrogenase\_\_Pseudomonas\_stutzeri1:0.0000000000):0.0000000000,WP\_1723  
99881\_1\_120-357\_alcohol\_dehydrogenase\_catalytic\_domain-  
containing\_protein\_\_Pseudomonas\_stutzeri1:0.0000000000):0.0000000000,WP\_043942343\_1  
\_114-351\_2\_3-  
butanediol\_dehydrogenase\_\_Pseudomonas\_stutzeri1:0.0000000000):0.0000000000,WP\_0145

97278\_1\_120-357\_MULTISPECIES\_\_2\_3-  
butanediol\_dehydrogenase\_\_Pseudomonas1:0.0000000000):0.0000000000,WP\_084900703\_1\_114-351\_2\_3-  
butanediol\_dehydrogenase\_\_Pseudomonas\_stutzeri1:0.0000000000):0.0000010000)/0.333/2:0.0000010000,WP\_164838473\_1\_120-357\_2\_3-  
butanediol\_dehydrogenase\_\_Pseudomonas\_sp\_\_BAY16631:0.0039981064)/0.333/2:0.0000010000,WP\_102828659\_1\_114-351\_2\_3-  
butanediol\_dehydrogenase\_\_Pseudomonas\_stutzeri1:0.0000010000)/0.996/33:0.0039907846,WP\_045163417\_1\_114-351\_2\_3-  
butanediol\_dehydrogenase\_\_Pseudomonas\_stutzeri1:0.0039892691)/0.333/9:0.0000010000,(WP\_155552765\_1\_114-351\_alcohol\_dehydrogenase\_catalytic\_domain-containing\_protein\_\_Pseudomonas\_sp\_\_JL9721:0.0080146603,(WP\_077683468\_1\_114-351\_2\_3-  
butanediol\_dehydrogenase\_\_Pseudomonas\_stutzeri1:0.0000010000,(WP\_043295739\_1\_114-351\_2\_3-  
butanediol\_dehydrogenase\_\_Pseudomonas\_sp\_\_HMP2711:0.0000010000,WP\_177325137\_1\_120-357\_alcohol\_dehydrogenase\_catalytic\_domain-containing\_protein\_\_Pseudomonas\_sp\_\_HMP2711:0.0000010000)/1/95:0.0039966689)/0.333/61:0.0000010000)/0.997/47:0.0039849061)/0.333/7:0.0000010000,(((QCT99030\_1\_114-351\_2\_3-  
butanediol\_dehydrogenase\_\_Pseudomonas\_stutzeri1:0.0000000000,WP\_125841745\_1\_114-351\_2\_3-  
butanediol\_dehydrogenase\_\_Pseudomonas\_stutzeri1:0.0000000000):0.0000000000,WP\_175415036\_1\_120-357\_alcohol\_dehydrogenase\_catalytic\_domain-containing\_protein\_\_Pseudomonas\_stutzeri1:0.0000000000):0.0000010000,CJL60718\_1\_120-357\_L-idoitol\_2-dehydrogenase\_\_Streptococcus\_pneumoniae1:0.0000010000)/0.333/41:0.0000010000)/0.995/36:0.0039765936)/0.975/65:0.0039841405)/0.47/52:0.0039576584,WP\_054093393\_1\_114-351\_2\_3-  
butanediol\_dehydrogenase\_\_Pseudomonas\_stutzeri1:0.0000010000)/1/99:0.0902957285)/0.615/46:0.0235617506,(((WP\_131345489\_1\_122-359\_2\_3-  
butanediol\_dehydrogenase\_\_Azotobacter\_chroococcum1:0.0119711476,(WP\_131253419\_1\_122-359\_2\_3-  
butanediol\_dehydrogenase\_\_Azotobacter\_chroococcum1:0.0039785059,WP\_152387195\_1\_122-359\_alcohol\_dehydrogenase\_catalytic\_domain-containing\_protein\_\_Azotobacter\_salinestris1:0.0000010000)/0.999/82:0.0079461577)/0.333/40:0.0000010000,WP\_089167274\_1\_122-359\_2\_3-  
butanediol\_dehydrogenase\_\_Azotobacter\_chroococcum1:0.0000010000)/0.929/62:0.0039596943,WP\_131348817\_1\_122-359\_2\_3-  
butanediol\_dehydrogenase\_\_Azotobacter\_chroococcum1:0.0000010000)/1/97:0.0345367972,((((WP\_123331195\_1\_124-363\_2\_3-  
butanediol\_dehydrogenase\_\_Pseudomonas\_chlororaphis1:0.0040174991,WP\_078473798\_1\_124-363\_2\_3-  
butanediol\_dehydrogenase\_\_Pseudomonas\_sp\_\_MF48361:0.0000010000)/1/100:0.032592215



1,((WP\_090401177\_1\_124-363\_2\_3-  
butanediol\_dehydrogenase\_\_Pseudomonas\_grimontii1:0.0039848970,(WP\_092490038\_1\_124-  
-363\_MULTISPECIES\_\_2\_3-  
butanediol\_dehydrogenase\_\_Pseudomonas1:0.0039785312,WP\_145335743\_1\_124-  
363\_MULTISPECIES\_\_alcohol\_dehydrogenase\_catalytic\_domain-  
containing\_protein\_\_Pseudomonas1:0.0000010000)/0.333/46:0.0000010000)/0.782/70:0.0039  
655319,(((WP\_053135455\_1\_124-363\_MULTISPECIES\_\_2\_3-  
butanediol\_dehydrogenase\_\_Pseudomonas1:0.0000000000,WP\_065948557\_1\_124-363\_2\_3-  
butanediol\_dehydrogenase\_\_Pseudomonas\_sp\_\_1\_R\_171:0.0000000000):0.0000000000,WP\_0  
92358634\_1\_124-363\_2\_3-  
butanediol\_dehydrogenase\_\_Pseudomonas\_sp\_\_NFACC251:0.0000000000):0.0000010000,WP  
\_146476775\_1\_124-363\_zinc-  
binding\_dehydrogenase\_\_Pseudomonas\_panacis1:0.0000010000)/0.333/97:0.0000010000)/0.  
988/78:0.0081165239)/1/95:0.0118817782,(WP\_144929381\_1\_124-  
363\_MULTISPECIES\_\_alcohol\_dehydrogenase\_catalytic\_domain-  
containing\_protein:0.0039492382,WP\_047702926\_1\_124-364\_2\_3-  
butanediol\_dehydrogenase\_\_Pseudomonas\_mediterranea1:0.0000010000)/0.999/98:0.007930  
2331)/1/95:0.0080132036,(EJL04810\_1\_114-351\_\_R\_R\_-  
butanediol\_dehydrogenase\_\_Pseudomonas\_fluorescens\_Q2-  
871:0.0000010000,WP\_033046087\_1\_124-361\_MULTISPECIES\_\_2\_3-  
butanediol\_dehydrogenase\_\_Pseudomonas1:0.0000010000)/0.333/92:0.0000010000)/0.997/8  
0:0.0039228877,WP\_072391337\_1\_124-363\_MULTISPECIES\_\_2\_3-  
butanediol\_dehydrogenase\_\_unclassified\_Pseudomonas1:0.0000010000)/0.333/75:0.0000020  
247,(WP\_072431053\_1\_124-363\_MULTISPECIES\_\_2\_3-  
butanediol\_dehydrogenase\_\_unclassified\_Pseudomonas1:0.0038839579,WP\_103894497\_1\_12  
4-363\_MULTISPECIES\_\_2\_3-  
butanediol\_dehydrogenase\_\_Pseudomonas1:0.0000010000)/0.661/56:0.0038836388)/0.475/6  
3:0.0146754960,(((WP\_172434038\_1\_121-358\_alcohol\_dehydrogenase\_catalytic\_domain-  
containing\_protein\_\_Pseudomonas\_otitidis1:0.0039518573,(WP\_142008231\_1\_121-  
358\_alcohol\_dehydrogenase\_catalytic\_domain-containing\_protein\_\_Rhizobium\_sp\_\_SLBN-  
41:0.0039433075,((WP\_044400485\_1\_121-358\_2\_3-  
butanediol\_dehydrogenase\_\_Pseudomonas\_sp\_\_FeS53a1:0.0000010000,WP\_074967769\_1\_1  
21-358\_2\_3-  
butanediol\_dehydrogenase\_\_Pseudomonas\_otitidis1:0.0000010000)/0.997/95:0.0039627038,(  
WP\_107330574\_1\_121-358\_2\_3-  
butanediol\_dehydrogenase\_\_Pseudomonas\_otitidis1:0.0039465596,WP\_160480480\_1\_121-  
358\_alcohol\_dehydrogenase\_catalytic\_domain-  
containing\_protein\_\_Pseudomonas\_otitidis1:0.0000010000)/0.333/47:0.0000010000)/0.992/7  
1:0.0039438894)/0.333/16:0.0000010000)/0.333/13:0.0000010000,WP\_173174470\_1\_121-  
358\_alcohol\_dehydrogenase\_catalytic\_domain-  
containing\_protein\_\_Pseudomonas\_sp\_\_TUM189991:0.0039498790)/0.958/94:0.0128926710,  
((WP\_089393462\_1\_121-358\_2\_3-  
butanediol\_dehydrogenase\_\_Pseudomonas\_delhiensis1:0.0040103642,WP\_109936788\_1\_121  
-358\_2\_3-

butanediol\_dehydrogenase\_\_Pseudomonas\_sp\_\_RW4071:0.0000010000)/1/100:0.020541235  
8,(((WP\_019363057\_1\_121-358\_2\_3-  
butanediol\_dehydrogenase\_\_Pseudomonas\_fuscovaginae1:0.0039447707,WP\_029379398\_1\_1  
21-358\_MULTISPECIES\_\_2\_3-  
butanediol\_dehydrogenase\_\_Pseudomonas1:0.0000010000)/1/98:0.0125453483,(WP\_054062  
391\_1\_121-358\_2\_3-  
butanediol\_dehydrogenase\_\_Pseudomonas\_fuscovaginae1:0.0000010000,WP\_054060720\_1\_1  
21-358\_2\_3-  
butanediol\_dehydrogenase\_\_Pseudomonas\_fuscovaginae1:0.0039304151)/1/96:0.0115494501  
) /0.388/66:0.0023060750,WP\_157383950\_1\_114-  
351\_alcohol\_dehydrogenase\_catalytic\_domain-  
containing\_protein\_\_Pseudomonas\_fuscovaginae1:0.0138548692)/0.999/88:0.0122900193)/0.  
982/88:0.0107651122)/1/95:0.0445788018)/1/92:0.0512107372)/1/99:0.0768238077)/1/100:0.  
.3435965155)/0.973/39:0.0487810786,(HCF71164\_1\_115-  
351\_butanediol\_dehydrogenase\_\_Syntrophomonas\_sp\_1:0.1026273414,(WP\_015051037\_1\_1  
15-351\_2\_3-  
butanediol\_dehydrogenase\_\_Thermacetogenium\_phaeum1:0.0075217948,WP\_174601862\_1\_  
115-351\_alcohol\_dehydrogenase\_catalytic\_domain-  
containing\_protein\_\_Clostridia\_bacterium1:0.0080896515)/1/100:0.1782042628)/1/100:0.161  
9222779)/1/63:0.1244678147,WP\_014808629\_1\_114-351\_2\_3-  
butanediol\_dehydrogenase\_\_Desulfomonile\_tiedjei1:0.2613699229)/0.999/72:0.1135738901)/  
0.835/63:0.0678914093,Bin\_142\_k127\_387501\_1:0.3426438617)/0.839/55:0.0834232251,RM  
F76288\_1\_114-352\_2\_3-butanediol\_dehydrogenase\_\_Chloroflexi\_bacterium1:0.6722211067);

### Supplementary Tree 3: K01692\_HGT

(NVM01985\_1\_1\_264\_enoyl\_CoA\_hydratase\_Candidatus\_Helarchaeota\_archaeon:0.83312998  
46,(((((((HHT02558\_1\_1\_262\_hypothetical\_protein\_Firmicutes\_bacterium:0.7380246242,TAK31  
830\_1\_1\_263\_2\_12\_epoxy\_12\_dihydrophenyl\_acetyl\_CoA\_isomerase\_Chloroflexi\_bacterium:  
0.6332545480)/1/87:0.1893469220,((OPY09380\_1\_24\_286\_12\_epoxyphenylacetyl\_CoA\_isome  
rase\_Syntrophaceae\_bacterium\_PtaB\_Bin095:0.7082449116,WP\_088554218\_1\_1\_263\_enoyl\_  
CoA\_hydratase/isomerase\_family\_protein\_Calderihabitans\_maritimus:0.4942707916)/1/100:0.  
2976349522,NIN52738\_1\_1\_260\_hypothetical\_protein\_Nitrososphaeria\_archaeon:0.58035745  
48)/0.795/33:0.0602613681)/0.99/30:0.0588120681,(((NIO16974\_1\_4\_260\_hypothetical\_prot  
ein\_Deltaproteobacteria\_bacterium:0.9733029539,((HHH88870\_1\_1\_263\_enoyl\_CoA\_hydratas  
e\_Deltaproteobacteria\_bacterium:0.0025459466,HFH12977\_1\_1\_263\_enoyl\_CoA\_hydratase\_  
Deltaproteobacteria\_bacterium:0.0224239409)/1/100:0.7603417562,((((((WP\_022960339\_1\_4  
\_263\_enoyl\_CoA\_hydratase/isomerase\_family\_protein\_Spongiibacter\_tropicus:0.0079755731,(  
MAY40106\_1\_4\_263\_enoyl\_CoA\_hydratase\_Spongiibacter\_sp\_:0.0000011419,MBU72847\_1\_4  
\_263\_enoyl\_CoA\_hydratase\_Spongiibacter\_sp\_:0.0039784071)/0.333/90:0.0000024190)/1/10  
0:0.4406201690,(TDJ47051\_1\_1\_262\_enoyl\_CoA\_hydratase\_Gammaproteobacteria\_bacterium  
:0.4314422340,(MAJ11716\_1\_7\_266\_enoyl\_CoA\_hydratase\_Thiotrichales\_bacterium:0.000002  
9272,MAX28164\_1\_7\_266\_enoyl\_CoA\_hydratase\_Thiotrichales\_bacterium:0.0039563911)/1/1

00:0.4909364506)/0.979/74:0.1489229627)/1/96:0.1147980551,(TDJ26142\_1\_1\_262\_enoyl\_CoA\_hydratase\_Gammaproteobacteria\_bacterium:0.3181573482,(HIG41239\_1\_1\_262\_enoyl\_CoA\_hydratase\_Gammaproteobacteria\_bacterium:0.2447671937,HIG62190\_1\_1\_262\_enoyl\_CoA\_hydratase\_Gammaproteobacteria\_bacterium:0.2719563615)/1/94:0.1175217482)/1/99:0.1441870880)/0.995/77:0.0985671266,(((MXZ38440\_1\_5\_263\_enoyl\_CoA\_hydratase\_Holophagales\_bacterium:0.0546262076,(MXX61753\_1\_5\_263\_enoyl\_CoA\_hydratase\_Holophagales\_bacterium:0.0000011419,MXW01160\_1\_5\_263\_enoyl\_CoA\_hydratase\_Holophagales\_bacterium:0.041297419)/1/100:0.0214990753)/0.61/82:0.0146948343,(MYF96639\_1\_5\_263\_enoyl\_CoA\_hydratase\_Holophagales\_bacterium:0.0049082453,MXX75453\_1\_5\_263\_enoyl\_CoA\_hydratase\_Holophagales\_bacterium:0.0159966924)/0.496/63:0.0107778967)/1/100:0.3674255534,(TDJ07750\_1\_1\_261\_enoyl\_CoA\_hydratase\_Deltaproteobacteria\_bacterium:0.0039547224,TDJ01512\_1\_1\_261\_enoyl\_CoA\_hydratase\_Deltaproteobacteria\_bacterium:0.0000030424)/1/100:0.2613437886)/0.977/75:0.0705437576)/0.995/89:0.0645153870,(((WP\_047152083\_1\_1\_261\_enoyl\_CoA\_hydratase/isomerase\_family\_protein\_Aneurinibacillus\_tyrosinisolvans:0.3350544444,(RMF84632\_1\_1\_262\_enoyl\_CoA\_hydratase\_Nitrospinae\_bacterium:0.1588167753,NOT54253\_1\_1\_262\_enoyl\_CoA\_hydratase\_Deltaproteobacteria\_bacterium:0.2256183666)/0.981/73:0.054793378)/0.891/50:0.0333018027,(OUM84412\_1\_1\_262\_enoyl\_CoA\_hydratase\_Bacillus\_thermozeamaize:0.3786246178,PZC48549\_1\_1\_262\_2\_12\_epoxy\_12\_dihydrophenyl\_\_acetyl\_CoA\_isomerase\_Chloroflexi\_bacterium:0.2854032102)/0.608/35:0.0285008649)/0.999/73:0.0821148136,HEG24298\_1\_4\_263\_enoyl\_CoA\_hydratase\_Chloroflexi\_bacterium:0.2790339599)/0.83/59:0.0346477342)/1/100:0.1894810228,((EQB64072\_1\_1\_260\_hypothetical\_protein\_RBG1\_1C00001G1651\_candidate\_division\_Zixibacteria\_bacterium\_RBG\_1:0.5103473436,HGH08770\_1\_1\_262\_enoyl\_CoA\_hydratase\_bacterium:0.2273634637)/0.99/75:0.1363353198,((WP\_089946360\_1\_1\_262\_enoyl\_CoA\_hydratase\_Candidatus\_Entotheonella\_palauensis:0.0628126412,PON17048\_1\_1\_262\_enoyl\_CoA\_hydratase\_Candidatus\_Entotheonella\_serta:0.0500057924)/1/100:0.3037114530,((OFZ96173\_1\_1\_263\_hypothetical\_protein\_A2Z64\_04200\_Betaproteobacteria\_bacterium\_RIFCSPLOWO2\_02\_67\_12:0.2706783853,((PYM70566\_1\_1\_262\_enoyl\_CoA\_hydratase\_Candidatus\_Rokubacteria\_bacterium:0.0039366891,(PYM46102\_1\_1\_262\_enoyl\_CoA\_hydratase\_Candidatus\_Rokubacteria\_bacterium:0.0000011419,PYM59437\_1\_1\_262\_enoyl\_CoA\_hydratase\_Candidatus\_Rokubacteria\_bacterium:0.0039358890)/0.333/74:0.0000011418)/1/100:0.0989338173,((PYO34832\_1\_1\_261\_enoyl\_CoA\_hydratase\_Candidatus\_Rokubacteria\_bacterium:0.0177245017,PYO55176\_1\_1\_250\_enoyl\_CoA\_hydratase\_partial\_Candidatus\_Rokubacteria\_bacterium:0.0035005108)/1/100:0.0634123728,(OGK80221\_1\_1\_262\_enoyl\_CoA\_hydratase\_Candidatus\_Rokubacteria\_bacterium\_GWC2\_70\_16:0.0734486363,HAM57983\_1\_1\_262\_enoyl\_CoA\_hydratase\_Candidatus\_Rokubacteria\_bacterium:0.0356989552)/1/98:0.0627768029)/0.634/76:0.0264733827)/1/98:0.0541897186)/0.973/75:0.0381276257,(((((((PYM18332\_1\_1\_262\_enoyl\_CoA\_hydratase\_Candidatus\_Rokubacteria\_bacterium:0.1849293936,((PYO53015\_1\_1\_263\_enoyl\_CoA\_hydratase\_Candidatus\_Rokubacteria\_bacterium:0.0000011419,PYM79205\_1\_1\_263\_enoyl\_CoA\_hydratase\_Candidatus\_Rokubacteria\_bacterium:0.0040072497)/1/100:0.1248047891,((RPH83126\_1\_1\_262\_enoyl\_CoA\_hydratase\_Candidatus\_Rokubacteria\_bacterium:0.1078168956,TMQ22533\_1\_1\_263\_enoyl\_CoA\_hydratase\_Candidatus\_Rokubacteria\_bacterium:0.0766258459)/0.874/61:0.0271234398,PYM23212\_1\_1\_263\_enoyl\_CoA\_hydratase\_Candidatus\_Rokubacteria\_bacterium:0.0574472028)/1/87:0.0396019351)/1/93:0.0633234161)/0.951/64:0.0402850042,(HEU51147\_1\_1\_262\_enoyl\_CoA\_hydratase\_Candidatus\_Rokubacteria\_b

acterium:0.0771264191,HGH14475\_1\_1\_262\_enoyl\_CoA\_hydratase\_Candidatus\_Rokubacteria\_bacterium:0.0790330793)/0.953/85:0.0210386494)/0.458/25:0.0090677250,((OLB09379\_1\_1\_262\_enoyl\_CoA\_hydratase\_Candidatus\_Rokubacteria\_bacterium\_13\_2\_20CM\_69\_10:0.0357563034,PYN98811\_1\_1\_262\_enoyl\_CoA\_hydratase\_Candidatus\_Rokubacteria\_bacterium:0.0463099144)/1/100:0.0683310293,OLC15008\_1\_1\_262\_enoyl\_CoA\_hydratase\_Candidatus\_Rokubacteria\_bacterium\_13\_1\_40CM\_69\_27:0.0784271305)/0.999/87:0.0260793632)/0.995/68:0.0196295075,(((OLB07792\_1\_1\_262\_enoyl\_CoA\_hydratase\_Candidatus\_Rokubacteria\_bacterium\_13\_2\_20CM\_69\_15\_1:0.0830014062,(OLD26694\_1\_1\_262\_enoyl\_CoA\_hydratase\_Candidatus\_Rokubacteria\_bacterium\_13\_1\_40CM\_2\_70\_45:0.0040275936,(PYM50798\_1\_1\_262\_enoyl\_CoA\_hydratase\_Candidatus\_Rokubacteria\_bacterium:0.0039772065,OLC53983\_1\_1\_262\_enoyl\_CoA\_hydratase\_Candidatus\_Rokubacteria\_bacterium\_13\_1\_40CM\_4\_69\_39:0.0000011419)/0.333/71:0.0000030253)/0.965/100:0.0082024567)/1/56:0.0242732052,PYM41228\_1\_1\_262\_enoyl\_CoA\_hydratase\_Candidatus\_Rokubacteria\_bacterium:0.0101100552)/0.775/36:0.0096152218,(OLD69372\_1\_1\_262\_enoyl\_CoA\_hydratase\_Candidatus\_Rokubacteria\_bacterium\_13\_1\_20CM\_70\_15:0.0000025219,OLA95737\_1\_1\_262\_enoyl\_CoA\_hydratase\_Candidatus\_Rokubacteria\_bacterium\_13\_2\_20CM\_69\_15\_2:0.0288553087)/1/87:0.0313358716)/1/94:0.0531242451)/1/70:0.0402285480,PYM32998\_1\_1\_262\_enoyl\_CoA\_hydratase\_Candidatus\_Rokubacteria\_bacterium:0.0622140043)/0.633/36:0.0071882857,((PYM73548\_1\_3\_264\_enoyl\_CoA\_hydratase\_Candidatus\_Rokubacteria\_bacterium:0.0587534983,(((PYN01599\_1\_1\_262\_enoyl\_CoA\_hydratase\_Candidatus\_Rokubacteria\_bacterium:0.0245229547,PYM94085\_1\_1\_262\_enoyl\_CoA\_hydratase\_Candidatus\_Rokubacteria\_bacterium:0.0164117193)/1/100:0.0475472745,PYO03971\_1\_1\_262\_enoyl\_CoA\_hydratase\_Candidatus\_Rokubacteria\_bacterium:0.0127357115)/0.622/36:0.0042578622,PYN43555\_1\_1\_262\_enoyl\_CoA\_hydratase\_Candidatus\_Rokubacteria\_bacterium:0.0239953974)/0.859/42:0.0046695102,(PYN84318\_1\_1\_262\_enoyl\_CoA\_hydratase\_Candidatus\_Rokubacteria\_bacterium:0.0121369492,PYN30494\_1\_1\_262\_enoyl\_CoA\_hydratase\_Candidatus\_Rokubacteria\_bacterium:0.0167854425)/1/95:0.0283255945)/0.99/81:0.0189190200)/1/100:0.0509215449,(((OGL14337\_1\_1\_262\_enoyl\_CoA\_hydratase\_Candidatus\_Rokubacteria\_bacterium\_RIFCSPLOWO2\_12\_FULL\_71\_22:0.0082359667,OGL11301\_1\_1\_262\_enoyl\_CoA\_hydratase\_Candidatus\_Rokubacteria\_bacterium\_RIFCSPLOWO2\_02\_FULL\_72\_37:0.0000011419)/1/100:0.0603867093,OGK98302\_1\_1\_262\_enoyl\_CoA\_hydratase\_Candidatus\_Rokubacteria\_bacterium\_RIFCSPHIGHO2\_02\_FULL\_73\_26:0.0277197065)/0.719/63:0.0093490640,OGK85136\_1\_5\_265\_enoyl\_CoA\_hydratase\_Candidatus\_Rokubacteria\_bacterium\_GWA2\_73\_35:0.0293944764)/1/100:0.0597015982)/0.982/50:0.0144285657)/1/93:0.0347993947,(PYM32938\_1\_1\_262\_enoyl\_CoA\_hydratase\_Candidatus\_Rokubacteria\_bacterium:0.1474690414,PYM04251\_1\_1\_262\_enoyl\_CoA\_hydratase\_Candidatus\_Rokubacteria\_bacterium:0.0893598655)/1/89:0.0564249454)/1/97:0.0577196231)/1/100:0.1672003733)/1/96:0.1038125604)/0.91/60:0.0658240927)/1/95:0.1251190968)/0.86/48:0.0592687754)/0.886/33:0.0671080814,((RLB40763\_1\_4\_265\_enoyl\_CoA\_hydratase\_Deltaproteobacteria\_bacterium:0.2542390776,NQU12792\_1\_4\_263\_enoyl\_CoA\_hydratase/isomerase\_family\_protein\_Desulfobacteraceae\_bacterium:0.1757668497)/1/100:0.4102489937,(KPK47696\_1\_1\_263\_hypothetical\_protein\_AMJ77\_02300\_Dehalococcoidia\_bacterium\_SM23\_28\_2:0.2316131645,KPK21689\_1\_1\_263\_hypothetical\_protein\_AMJ76\_02015\_Dehalococcoidia\_bacterium\_SM23\_28\_1:0.2552745520)/1/100:0.2636743306)/0.981/57:0.0864397658)/0.857/29:0.0540162306,((MBD87052\_1\_3\_261\_enoyl\_CoA\_hydratase\_Rhodospirillaceae\_bacterium:0.0662127768,(PPR17935\_1\_3\_262\_12\_epoxyphenylacetyl\_CoA\_isomerase\_

Alphaproteobacteria\_bacterium\_MarineAlpha9\_Bin7:0.0256414368,((HIA21528\_1\_3\_262\_eno  
yl\_CoA\_hydratase\_Alphaproteobacteria\_bacterium:0.0118245614,HIC70824\_1\_3\_262\_eno  
yl\_CoA\_hydratase\_Alphaproteobacteria\_bacterium:0.0000011419)/0.333/63:0.0000024729,PPR3  
6715\_1\_3\_262\_12\_epoxyphenylacetyl\_CoA\_isomerase\_Alphaproteobacteria\_bacterium\_Marin  
eAlpha9\_Bin6:0.0039184013)/1/100:0.0640842423)/1/99:0.0802788179)/1/100:0.4744460018  
,(WP\_169546116\_1\_3\_265\_enoyl\_CoA\_hydratase/isomerase\_family\_protein\_Sneathiella\_sp\_2  
16LB\_ZA1\_12:0.1055738154,(WP\_025899401\_1\_3\_265\_enoyl\_CoA\_hydratase\_Sneathiella\_glo  
ssodoripedis:0.1453608717,OUR79878\_1\_3\_265\_hypothetical\_protein\_A9Q83\_02720\_Alphapr  
oteobacteria\_bacterium\_46\_93\_T64:0.0803262062)/0.994/99:0.0793761955)/1/100:0.538944  
8623)/1/99:0.2912923244)/1/44:0.1013213308)/0.8/27:0.0330655094,Bin\_142\_k127\_620341  
3:0.4586814980)/1/75:0.1051350117,(((PYP91878\_1\_2\_261\_2\_12\_epoxy\_12\_dihydrophenyl  
\_acetyl\_CoA\_isomerase\_Acidobacteria\_bacterium:0.0162886976,OLE89712\_1\_2\_261\_hypothe  
tical\_protein\_AUG08\_03020\_Acidobacteria\_bacterium\_13\_1\_20CM\_2\_55\_15:0.0000011419)/  
0.489/36:0.0040447898,PYR84985\_1\_2\_261\_2\_12\_epoxy\_12\_dihydrophenyl\_acetyl\_CoA\_iso  
merase\_Acidobacteria\_bacterium:0.0000032415)/1/100:0.8573895524,((OLN30954\_1\_3\_265\_  
Enoyl\_CoA\_hydratase\_Desulfosporosinus\_sp\_OL:0.0000011419,WP\_075365399\_1\_1\_263\_eno  
yl\_CoA\_hydratase/isomerase\_family\_protein\_Desulfosporosinus\_sp\_OL:0.0000011419)/0.999/  
100:0.0830306075,KUO72210\_1\_1\_263\_hypothetical\_protein\_APF81\_17100\_Desulfosporosinu  
s\_sp\_BRH\_c37:0.1054932032)/1/100:0.6297755742)/0.668/55:0.0816676067,RLI05505\_1\_1\_2  
56\_hypothetical\_protein\_DRO26\_01975\_Candidatus\_Bathyarchaeota\_archaeon:0.6045668462  
)0.999/69:0.1454268779)/0.45/32:0.0283488953,((PYS89907\_1\_1\_264\_2\_12\_epoxy\_12\_dihy  
drophenyl\_acetyl\_CoA\_isomerase\_Acidobacteria\_bacterium:0.5133283175,PYS50968\_1\_1\_263  
\_2\_12\_epoxy\_12\_dihydrophenyl\_acetyl\_CoA\_isomerase\_Acidobacteria\_bacterium:0.4162091  
368)/1/100:0.3195320597,(WP\_174656645\_1\_1\_259\_enoyl\_CoA\_hydratase/isomerase\_family  
\_protein\_Chloroflexi\_bacterium:0.5726770921,(HBH05209\_1\_5\_259\_2\_12\_epoxy\_12\_dihydr  
ophenyl\_acetyl\_CoA\_isomerase\_Flavobacteriales\_bacterium:0.5128974009,RMG64658\_1\_1\_2  
64\_2\_12\_epoxy\_12\_dihydrophenyl\_acetyl\_CoA\_isomerase\_Calditrichaeota\_bacterium:0.4225  
204670)/1/98:0.2043783354)/1/98:0.2645891943)/0.999/84:0.1466920526)/0.708/47:0.12433  
76449,RMD94215\_1\_1\_265\_enoyl\_CoA\_hydratase\_Calditrichaeota\_bacterium:0.6534846015);
